# Supplementary material for: Virtual reality and 3D printing improve preoperative visualization of 3D liver reconstructions—results from a preclinical comparison of presentation modalities and user’s preference
Source: PubMed Central journal article supplement — Ann Transl Med. 2021 Jul;9(13):1074. doi: 10.21037/atm-21-512 (PMC8339861; doi:10.21037/atm-21-512), 2021-07
Supplement: atm-09-13-1074-dss.pdf [file atm-09-13-1074-dss.pdf]

## Data Sharing Statement

|                     |                                                                                                                                                     |                                                                                                                                                               |
|---------------------|-----------------------------------------------------------------------------------------------------------------------------------------------------|---------------------------------------------------------------------------------------------------------------------------------------------------------------|
| <b>Article Info</b> | <a href="http://dx.doi.org/10.21037/atm-21-512">http://dx.doi.org/10.21037/atm-21-512</a>                                                           |                                                                                                                                                               |
| <b>Item</b>         | <b>Question</b>                                                                                                                                     | <b>Authors' Response<br/>(place "-" if not applicable)</b>                                                                                                    |
| 1                   | Would you like to share data collected for your study to others?                                                                                    | Yes                                                                                                                                                           |
| 2                   | If not, would you like to share the reason for your decision?                                                                                       | -                                                                                                                                                             |
| 3                   | What data in particular will be shared?                                                                                                             | The correctness scores will be shared. We also plan to make the software for the VR application available.                                                    |
| 4                   | Any other documents will be shared? Such as study protocol, statistical analysis plan, informed consent form, clinical study report, analytic code. | Questionnaires, Tests, statistical analysis will also be shared if requested.                                                                                 |
| 5                   | When will data availability begin?                                                                                                                  | From the publication date.                                                                                                                                    |
| 6                   | When will data availability end?                                                                                                                    | One year after publication date, since technical innovations especially in VR will probably outdate actual study.                                             |
| 7                   | To whom will you share the data?                                                                                                                    | Surgeons, surgical educators and computer scientist who are interested in 3D reconstructions.                                                                 |
| 8                   | For what type of analysis or purpose?                                                                                                               | For the use of a 3D presentation modality in surgical planning or education or for a follow up study.                                                         |
| 9                   | How or where can the data/documents be obtained?                                                                                                    | Email could be sent to the address below to obtain the shared data:<br><a href="mailto:Tobias.Huber@unimedizin-mainz.de">Tobias.Huber@unimedizin-mainz.de</a> |
| 10                  | Any other restrictions?                                                                                                                             | We may balance the potential benefits and risks for each request and then provide the data that could be shared.                                              |
